# Supplementary material for: Serum metabolomics analysis reveals amelioration effects of sea cucumber ether phospholipids on oxidative stress and inflammation in high-fat diet-fed mice
Source: Royal Society of Chemistry journal article supplement (doi:10.1039/d2fo00918h), 2022-01-01
Supplement: d2fo00918h1.pdf [file d2fo00918h1.pdf]

**Serum metabolomics analysis reveals amelioration effects of sea cucumber ether phospholipids on oxidative stress and inflammation in high-fat diet-fed mice**

Xincen Wang<sup>1</sup>, Haohui Lan<sup>1</sup>, Tong Sun<sup>1</sup>, Peixu Cong<sup>1</sup>, Changhu Xue<sup>1,2\*</sup>, Jie Xu<sup>1\*</sup>

<sup>1</sup> College of Food Science and Engineering, Ocean University of China, No. 5, Yushan Road, Qingdao, Shandong Province 266003, China

<sup>2</sup> Laboratory of Marine Drugs and Biological Products, Pilot National Laboratory for Marine Science and Technology (Qingdao), No. 1, Wenhai Road, Qingdao, Shandong Province, 266237, China

\*Corresponding author. Tel/Fax: +86-532-82032597. E-mail: xujie9@ouc.edu.cn;

Tel/Fax: +86-532-82032468. E-mail: xuech@ouc.edu.cn

Xincen Wang: cen0812@163.com

Haohui Lan: 1392137400@qq.com

Tong Sun: 2029204547@qq.com

Peixu Cong: congpeixu@ouc.edu.cn

Changhu Xue: xuech@ouc.edu.cn

Jie Xu: xujie9@ouc.edu.cn

**Table S1.** The predominant molecular species of the plasmanyl PC and plasmeryl PE subclasses in sea cucumber (*Cucumaria frondosa*).

| Molecular species | Relative content (%) | Molecular species | Relative content (%) |
|-------------------|----------------------|-------------------|----------------------|
| PC(P-14:0/20:4)   | 0.3±0.0              | PE(P-18:0/17:0)   | 0.1±0.0              |
| PC(O-16:0/15:0)   | 1.9±0.2              | PE(P-16:0/20:5)   | 0.1±0.0              |
| PC(O-16:1/17:1)   | 0.2±0.0              | PE(P-18:0/18:1)   | 0.2±0.1              |
| PC(O-16:0/17:0)   | 10.4±0.2             | PE(P-18:0/18:0)   | 5.0±0.4              |
| PC(O-18:0/16:1)   | 0.2±0.0              | PE(P-17:0/20:5)   | 0.2±0.1              |
| PC(O-15:0/20:5)   | 0.3±0.0              | PE(P-18:0/19:1)   | 0.1±0.0              |
| PC(O-15:0/20:4)   | 0.2±0.0              | PE(P-18:0/19:0)   | 0.5±0.1              |
| PC(O-18:0/17:2)   | 0.2±0.0              | PE(P-18:1/20:5)   | 0.1±0.0              |
| PC(O-17:0/18:1)   | 0.7±0.0              | PE(P-18:0/20:5)   | 69.1±0.2             |
| PC(O-16:1/20:5)   | 0.7±0.2              | PE(P-18:0/20:4)   | 13.8±0.4             |
| PC(O-16:0/20:5)   | 9.3±0.4              | PE(P-18:0/20:2)   | 0.1±0.1              |
| PC(O-16:0/20:4)   | 1.2±0.2              | PE(P-18:0/20:1)   | 0.5±0.1              |
| PC(O-16:0/20:3)   | 0.2±0.0              | PE(P-18:0/20:0)   | 1.5±0.3              |
| PC(O-16:0/20:2)   | 0.2±0.0              | PE(P-19:1/20:5)   | 0.1±0.0              |
| PC(O-17:1/20:5)   | 0.3±0.1              | PE(P-19:2/20:4)   | 0.1±0.0              |
| PC(O-17:0/20:5)   | 2.8±0.3              | PE(P-19:0/20:5)   | 2.9±0.1              |
| PC(O-17:0/20:4)   | 0.5±0.0              | PE(P-19:1/20:4)   | 0.2±0.0              |
| PC(O-18:2/20:5)   | 0.2±0.0              | PE(P-19:0/20:4)   | 1.0±0.3              |
| PC(O-18:1/20:5)   | 36.4±0.1             | PE(P-19:0/20:3)   | 0.1±0.0              |
| PC(O-18:0/20:5)   | 21.5±0.1             | PE(P-18:0/21:1)   | 0.2±0.1              |
| PC(O-18:0/20:4)   | 2.0±0.2              | PE(P-20:2/20:5)   | 0.1±0.0              |
| PC(O-18:1/20:2)   | 0.2±0.0              | PE(P-19:0/20:0)   | 0.1±0.0              |
| PC(O-19:2/20:5)   | 0.5±0.0              | PE(P-20:1/20:5)   | 0.5±0.2              |
| PC(O-19:1/20:5)   | 2.0±0.1              | PE(P-20:0/20:5)   | 0.2±0.0              |
| PC(O-19:0/20:5)   | 0.3±0.0              | PE(P-20:1/20:4)   | 1.0±0.2              |
| PC(O-19:0/20:4)   | 0.3±0.0              | PE(P-20:0/20:4)   | 0.5±0.0              |
| PC(O-20:3/20:5)   | 4.1±0.1              | PE(P-18:0/22:1)   | 0.2±0.0              |
| PC(O-18:1/22:6)   | 0.2±0.0              | PE(P-19:0/22:5)   | 0.1±0.1              |
| PC(O-20:1/20:5)   | 1.7±0.2              | PE(P-18:0/23:1)   | 0.3±0.1              |
| PC(O-20:0/20:5)   | 0.5±0.0              | PE(P-19:0/22:1)   | 0.1±0.1              |
| PC(O-20:0/20:4)   | 0.2±0.0              | PE(P-18:0/25:1)   | 0.2±0.1              |
| PC(O-18:1/24:6)   | 0.5±0.0              | PE(P-24:0/20:4)   | 0.2±0.1              |

Results are displayed as mean ± SD ( $n = 5$ ).

**Table S2.** The differential metabolites identified by cross-comparisons of different groups (ND versus HFD) in mice serum samples.

| Metabolites                | HMDB ID     | Formula                                                         | Obs <i>m/z</i> | FC     | <i>p</i> value |
|----------------------------|-------------|-----------------------------------------------------------------|----------------|--------|----------------|
| 11,12-EET                  | HMDB0004673 | C <sub>20</sub> H <sub>32</sub> O <sub>3</sub>                  | 320.2351       | 2.8015 | 6.22E-06       |
| 12 -HPETE                  | HMDB0004243 | C <sub>20</sub> H <sub>32</sub> O <sub>4</sub>                  | 336.2301       | 0.2588 | 1.79E-03       |
| 12,13-DiHOME               | HMDB0004705 | C <sub>18</sub> H <sub>34</sub> O <sub>4</sub>                  | 314.2457       | 0.0880 | 1.65E-04       |
| 12,13-EpODE                | HMDB0010220 | C <sub>18</sub> H <sub>30</sub> O <sub>3</sub>                  | 294.2195       | 0.1543 | 6.65E-02       |
| 12-HETE                    | HMDB0006111 | C <sub>20</sub> H <sub>32</sub> O <sub>3</sub>                  | 320.2351       | 0.1253 | 2.79E-06       |
| 15(S)-HETE                 | HMDB03876   | C <sub>20</sub> H <sub>32</sub> O <sub>3</sub>                  | 320.2347       | 0.4800 | 8.40E-04       |
| 2-hydroxybutyric acid      | HMDB0000008 | C <sub>4</sub> H <sub>8</sub> O <sub>3</sub>                    | 104.0473       | 0.1798 | 1.18E-03       |
| 9,10-DiHOME                | HMDB0004704 | C <sub>18</sub> H <sub>34</sub> O <sub>4</sub>                  | 314.2457       | 0.4314 | 4.63E-06       |
| 9-HODE                     | HMDB0062652 | C <sub>18</sub> H <sub>32</sub> O <sub>3</sub>                  | 296.2351       | 0.2278 | 2.67E-04       |
| Acetylcarnitine            | HMDB0000201 | C <sub>9</sub> H <sub>18</sub> NO <sub>4</sub>                  | 204.1236       | 0.5370 | 2.76E-03       |
| Acetylcholine              | HMDB0000895 | C <sub>7</sub> H <sub>16</sub> NO <sub>2</sub>                  | 146.1181       | 0.4954 | 1.56E-02       |
| Adenosine                  | HMDB0000050 | C <sub>10</sub> H <sub>13</sub> N <sub>5</sub> O <sub>4</sub>   | 267.0968       | 0.4132 | 3.49E-06       |
| Adenosine 5'-monophosphate | HMDB0000045 | C <sub>10</sub> H <sub>14</sub> N <sub>5</sub> O <sub>7</sub> P | 347.0631       | 0.2777 | 4.85E-06       |
| Adipic acid                | HMDB0000448 | C <sub>6</sub> H <sub>10</sub> O <sub>4</sub>                   | 146.0579       | 0.4080 | 6.67E-03       |
| Adrenic acid               | HMDB02226   | C <sub>22</sub> H <sub>36</sub> O <sub>2</sub>                  | 332.2711       | 0.3728 | 1.64E-04       |
| Alpha-ketoglutarate        | HMDB0000208 | C <sub>5</sub> H <sub>6</sub> O <sub>5</sub>                    | 146.0215       | 0.2174 | 7.42E-03       |
| Amino adipic acid          | HMDB0000510 | C <sub>6</sub> H <sub>11</sub> NO <sub>4</sub>                  | 296.2351       | 0.2318 | 4.31E-05       |
| Arachidonic acid           | HMDB0001043 | C <sub>20</sub> H <sub>32</sub> O <sub>2</sub>                  | 304.2402       | 0.0963 | 8.20E-03       |
| Arginine                   | HMDB0000517 | C <sub>6</sub> H <sub>14</sub> N <sub>4</sub> O <sub>2</sub>    | 174.1117       | 2.3020 | 4.11E-02       |
| Carnitine                  | HMDB0000062 | C <sub>7</sub> H <sub>16</sub> NO <sub>3</sub>                  | 162.1130       | 2.7424 | 3.66E-03       |
| Cerulenin                  | HMDB0015168 | C <sub>12</sub> H <sub>17</sub> NO <sub>3</sub>                 | 223.2683       | 0.4349 | 3.90E-04       |
| Choline                    | HMDB0000097 | C <sub>5</sub> H <sub>14</sub> NO                               | 104.1075       | 2.4393 | 1.87E-04       |
| Citrate                    | HMDB0000094 | C <sub>6</sub> H <sub>8</sub> O <sub>7</sub>                    | 192.0270       | 0.1797 | 1.18E-03       |
| Citrulline                 | HMDB0000904 | C <sub>6</sub> H <sub>13</sub> N <sub>3</sub> O <sub>3</sub>    | 175.0957       | 0.4442 | 3.51E-04       |
| Creatine                   | HMDB0000064 | C <sub>4</sub> H <sub>9</sub> N <sub>3</sub> O <sub>2</sub>     | 131.0695       | 2.4053 | 6.65E-03       |
| Creatinine                 | HMDB0000562 | C <sub>4</sub> H <sub>7</sub> N <sub>3</sub> O                  | 113.0589       | 2.0389 | 2.61E-02       |
| Cytidine                   | HMDB0000089 | C <sub>9</sub> H <sub>13</sub> N <sub>3</sub> O <sub>5</sub>    | 243.0855       | 0.3030 | 4.60E-03       |
| Cytosine                   | HMDB0000630 | C <sub>4</sub> H <sub>5</sub> N <sub>3</sub> O                  | 111.0433       | 0.4294 | 2.72E-02       |
| Deoxyglucose               | HMDB0062477 | C <sub>6</sub> H <sub>12</sub> O <sub>5</sub>                   | 164.0685       | 0.2742 | 6.29E-05       |
| Docosahexaenoic Acid       | HMDB02183   | C <sub>22</sub> H <sub>32</sub> O <sub>2</sub>                  | 328.2402       | 5.6775 | 3.60E-03       |
| Dodecanoylcarnitine        | HMDB02250   | C <sub>19</sub> H <sub>37</sub> NO <sub>4</sub>                 | 343.2721       | 0.2710 | 5.79E-06       |
| Dodecenoic acid            | HMDB0032248 | C <sub>12</sub> H <sub>22</sub> O <sub>2</sub>                  | 198.1620       | 0.4724 | 2.23E-03       |
| Eicosapentaenoic acid      | HMDB01999   | C <sub>20</sub> H <sub>30</sub> O <sub>2</sub>                  | 302.2241       | 4.4849 | 1.35E-05       |
| Gluconic acid              | HMDB0001316 | C <sub>6</sub> H <sub>13</sub> O <sub>10</sub> P                | 276.0246       | 0.3701 | 4.81E-02       |
| Glucose                    | HMDB0000122 | C <sub>6</sub> H <sub>12</sub> O <sub>6</sub>                   | 180.0634       | 0.6713 | 7.82E-04       |
| Glutamate                  | HMDB0060475 | C <sub>5</sub> H <sub>9</sub> NO <sub>4</sub>                   | 147.0532       | 3.0421 | 2.62E-03       |
| Glutamine                  | HMDB0000641 | C <sub>5</sub> H <sub>10</sub> N <sub>2</sub> O <sub>3</sub>    | 146.0691       | 2.1579 | 9.88E-02       |
| Histamine                  | HMDB0000870 | C <sub>5</sub> H <sub>9</sub> N <sub>3</sub>                    | 111.0796       | 0.4962 | 1.27E-05       |
| Histidine                  | HMDB00177   | C <sub>6</sub> H <sub>9</sub> N <sub>3</sub> O <sub>2</sub>     | 155.0695       | 0.4177 | 5.29E-05       |

| Metabolites             | HMDB ID     | Formula                                                       | Obs <i>m/z</i> | FC     | <i>P</i> value |
|-------------------------|-------------|---------------------------------------------------------------|----------------|--------|----------------|
| Hydroxybutyrylcarnitine | HMDB13127   | C <sub>11</sub> H <sub>21</sub> NO <sub>5</sub>               | 247.1419       | 0.2736 | 3.96E-03       |
| Hydroxyproline          | HMDB0000725 | C <sub>5</sub> H <sub>9</sub> NO <sub>3</sub>                 | 131.0582       | 0.1583 | 4.62E-02       |
| Isoleucine              | HMDB0000172 | C <sub>6</sub> H <sub>13</sub> NO <sub>2</sub>                | 131.0946       | 0.2060 | 7.26E-02       |
| Leucine                 | HMDB00687   | C <sub>6</sub> H <sub>13</sub> NO <sub>2</sub>                | 131.0946       | 0.1197 | 7.08E-05       |
| Linoleic Acid           | HMDB0000673 | C <sub>18</sub> H <sub>32</sub> O <sub>2</sub>                | 280.2402       | 0.2710 | 5.79E-06       |
| Linolenic acid          | HMDB03073   | C <sub>18</sub> H <sub>30</sub> O <sub>2</sub>                | 278.2241       | 2.0042 | 2.30E-02       |
| Linoleyl carnitine      | HMDB0006469 | C <sub>25</sub> H <sub>46</sub> NO <sub>4</sub>               | 424.3421       | 0.1561 | 2.40E-04       |
| Lysine                  | HMDB0000182 | C <sub>6</sub> H <sub>14</sub> N <sub>2</sub> O <sub>2</sub>  | 146.1055       | 2.2475 | 2.14E-03       |
| LysoPC (18:1)           | HMDB0002815 | C <sub>26</sub> H <sub>52</sub> NO <sub>7</sub> P             | 521.3481       | 4.4162 | 9.89E-08       |
| LysoPC (16:0)           | HMDB0010382 | C <sub>24</sub> H <sub>50</sub> NO <sub>7</sub> P             | 495.3325       | 0.2736 | 3.16E-02       |
| LysoPC (18:0)           | HMDB0010384 | C <sub>26</sub> H <sub>54</sub> NO <sub>7</sub> P             | 523.3638       | 0.1197 | 7.08E-05       |
| LysoPC (18:2)           | HMDB10386   | C <sub>26</sub> H <sub>50</sub> NO <sub>7</sub> P             | 519.3326       | 4.4849 | 8.63E-04       |
| LysoPE (16:0)           | HMDB11473   | C <sub>21</sub> H <sub>44</sub> NO <sub>7</sub> P             | 453.2856       | 2.2969 | 3.42E-02       |
| LysoPE (18:2)           | HMDB11477   | C <sub>23</sub> H <sub>44</sub> NO <sub>7</sub> P             | 477.2855       | 2.4052 | 6.65E-03       |
| Malic acid              | HMDB0031518 | C <sub>4</sub> H <sub>6</sub> O <sub>5</sub>                  | 134.0215       | 0.6870 | 4.94E-04       |
| N-Acetylisoleucine      | HMDB61684   | C <sub>8</sub> H <sub>15</sub> NO <sub>3</sub>                | 173.1051       | 0.7040 | 8.91E-05       |
| N-Acetylleucine         | HMDB11756   | C <sub>8</sub> H <sub>15</sub> NO <sub>3</sub>                | 173.1051       | 0.2616 | 5.72E-06       |
| Nonadecanoic acid       | HMDB00772   | C <sub>19</sub> H <sub>38</sub> O <sub>2</sub>                | 298.2867       | 0.4989 | 2.76E-03       |
| Palmitic Acid           | HMDB0000220 | C <sub>16</sub> H <sub>32</sub> O <sub>2</sub>                | 256.2402       | 0.3814 | 1.54E-03       |
| Palmitoleic acid        | HMDB03229   | C <sub>16</sub> H <sub>30</sub> O <sub>2</sub>                | 254.2243       | 2.6897 | 3.49E-03       |
| Palmitoylcarnitine      | HMDB0000222 | C <sub>23</sub> H <sub>46</sub> NO <sub>4</sub>               | 400.3421       | 0.1726 | 1.07E-05       |
| Paullinic acid          | HMDB35159   | C <sub>20</sub> H <sub>38</sub> O <sub>2</sub>                | 310.2867       | 0.3030 | 4.60E-03       |
| PC (22:6)               | HMDB08731   | C <sub>48</sub> H <sub>78</sub> NO <sub>8</sub> P             | 827.5440       | 2.2475 | 6.97E-05       |
| Phenylalanine           | HMDB0000159 | C <sub>9</sub> H <sub>11</sub> NO <sub>2</sub>                | 165.0790       | 3.5643 | 2.40E-03       |
| Proline                 | HMDB0000162 | C <sub>5</sub> H <sub>9</sub> NO <sub>2</sub>                 | 115.0633       | 2.6804 | 1.52E-02       |
| Prostaglandin D2        | HMDB0001403 | C <sub>20</sub> H <sub>32</sub> O <sub>5</sub>                | 352.2250       | 0.4939 | 8.02E-04       |
| Prostaglandin E1        | HMDB0001442 | C <sub>20</sub> H <sub>34</sub> O <sub>5</sub>                | 354.2406       | 0.4301 | 6.22E-03       |
| Prostaglandin E2        | HMDB0001220 | C <sub>20</sub> H <sub>32</sub> O <sub>5</sub>                | 352.2250       | 0.2315 | 7.84E-03       |
| Prostaglandin F2        | HMDB0004240 | C <sub>20</sub> H <sub>32</sub> O <sub>5</sub>                | 352.2250       | 0.4126 | 5.12E-05       |
| Spermidine              | HMDB0001257 | C <sub>7</sub> H <sub>19</sub> N <sub>3</sub>                 | 145.1579       | 3.0421 | 9.29E-05       |
| Spermine                | HMDB0001256 | C <sub>10</sub> H <sub>26</sub> N <sub>4</sub>                | 202.2157       | 2.7791 | 4.55E-04       |
| Sphingosine             | HMDB0000252 | C <sub>18</sub> H <sub>37</sub> NO <sub>2</sub>               | 299.2824       | 2.4967 | 1.12E-04       |
| Succinate               | HMDB0000254 | C <sub>4</sub> H <sub>6</sub> O <sub>4</sub>                  | 118.0266       | 0.3442 | 5.64E-03       |
| Tetracosahexaenoic acid | HMDB02007   | C <sub>24</sub> H <sub>36</sub> O <sub>2</sub>                | 356.2710       | 0.4597 | 1.76E-02       |
| Tryptophan              | HMDB0000929 | C <sub>11</sub> H <sub>12</sub> N <sub>2</sub> O <sub>2</sub> | 204.0899       | 2.2783 | 3.16E-02       |
| Ttridecanoylcarnitine   | HMDB05066   | C <sub>21</sub> H <sub>41</sub> NO <sub>4</sub>               | 371.3035       | 0.2612 | 1.59E-05       |
| Uric acid               | HMDB0000289 | C <sub>5</sub> H <sub>4</sub> N <sub>4</sub> O <sub>3</sub>   | 168.0283       | 2.4102 | 2.15E-05       |
| Valine                  | HMDB0000883 | C <sub>5</sub> H <sub>11</sub> NO <sub>2</sub>                | 117.0790       | 0.1998 | 1.02E-04       |

Variable importance in the projection (VIP) was obtained from OPLS-DA with a threshold of 1.0. Human Metabolome Database ID (HMDB ID). observed *m/z* (Obs

$m/z$ ). Fold change (FC) was calculated from the arithmetic mean values between ND and HFD group.  $P$  value was calculated from WilcoxonMann U test.

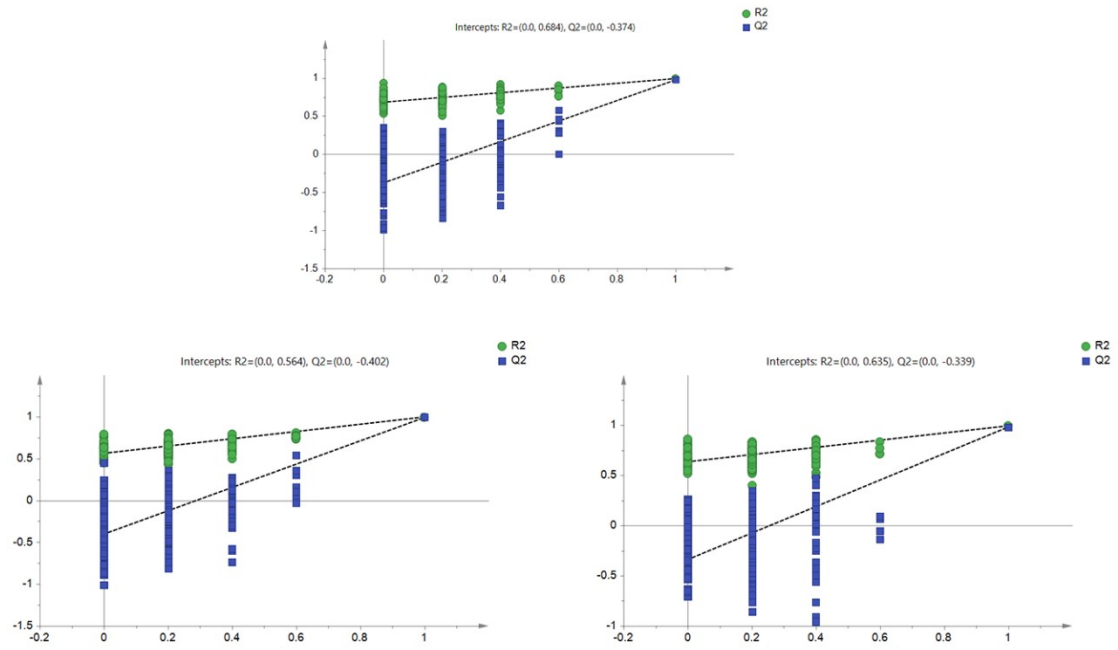

**Figure S1.** Permutation tests of the OPLS-DA model of ND vs. HFD, HFD vs. HFD+PC-O and HFD+PE-P groups.
